# Supplementary material for: Organ and Tissue-Specific Localisation of Selected Cell Wall Epitopes in the Zygotic Embryo of Brachypodium distachyon
Source: MDPI journal article supplement (doi:10.3390/ijms19030725), 2018-03-03
Supplement: s1 [file s1]

# Supplementary Materials: Organ and Tissue-Specific Localisation of Selected Cell Wall Epitopes in the Zygotic Embryo of *Brachypodium distachyon*

Alexander Betekhtin, Anna Milewska-Hendel, Joanna Lusinska, Lukasz Chajec, Ewa Kurczynska and Robert Hasterok

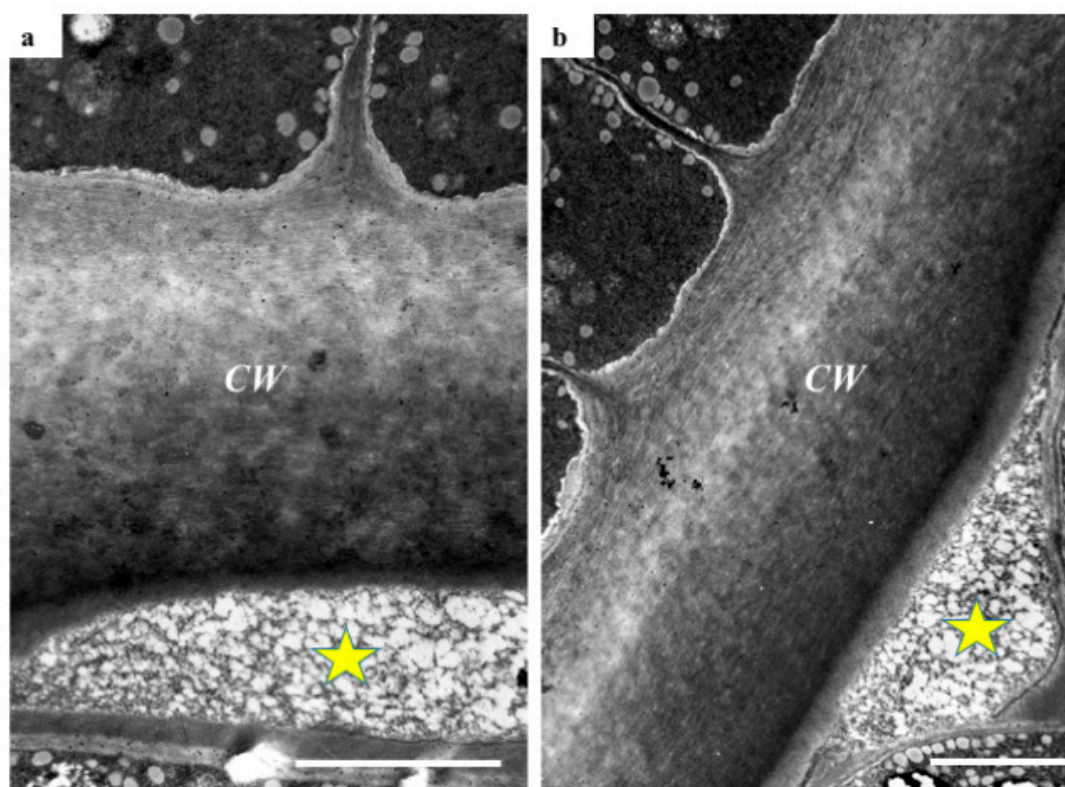

**Figure S1.** TEM of the radicle epidermis (a,b). Yellow stars showing the space with fibrillary component between radicle and coleorhiza. Abbreviations: CW—cell wall. Bars: (a) 3  $\mu\text{m}$ ; (b) 4.5  $\mu\text{m}$ .

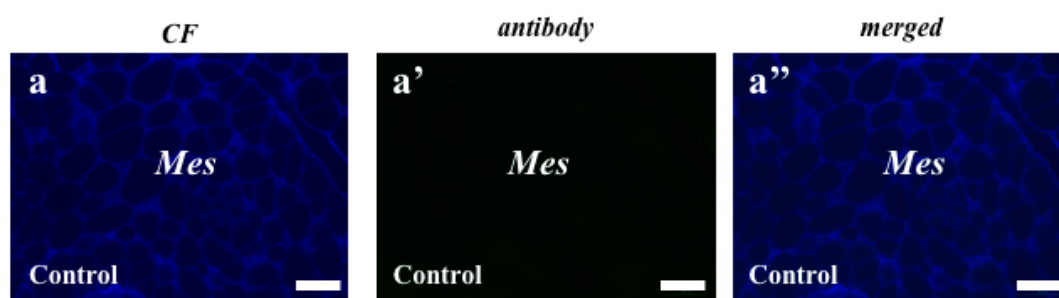

**Figure S2.** Negative control. (a–a'') no antibody fluorescent signals are present. Abbreviations: CF—calcofluor, Mes—mesocotyl. Bars: 10  $\mu\text{m}$ .
